# Supplementary material
Source: publisher figshare collection journal article supplement (https://tandf.figshare.com/ndownloader/files/39655699)
Supplement: Supplementary file 1 [file 39655699]

Appendix 1. Neonatal LP procedural checklist

| **Procedural steps** |
| --- |
| Washed hands |
| Anatomical location identified |
| Sterile gloves on |
| Equipment set up |
| Clean skin |
| Drape patient |
| Lidocaine injected/appropriate analgesia provided |
| Needle orientation |
| Needle bevel correct |
| Needle slowly advanced |
| Opening pressure |
| Obtains and collects fluid |
| Re-inserts stylet at end |
| Dressing applied |
| Sterile technique maintained |

Appendix 2. Adult LP procedural checklist

| **Procedural Steps** |
| --- |
| Identify L4-L5 interspace |
| Apply gloves with sterile technique |
| Place sponge stick into Betadine |
| Wipe skin with circular motion |
| Insert needle into subcutaneous (SQ) tissue |
| Inject anesthetic solution |
| Place needle in centre of interspace |
| Angle needle toward umbilicus |
| Advance needle slowly and smoothly |
| Orient bevel of needle correctly |
| Advance needle past SQ tissue |
| Remove stylet and check for fluid (*if fluid obtained on 1st attempt, please check “Yes” for next 3 steps up until “Attach manometer”) |
| Reinsert stylet (unless fluid is obtained) |
| Remove stylet (if needed) |
| If obstruction, withdraw needle and reinsert |
| Attach manometer and stopcock to needle |
| Turn stopcock correctly |
| Allow fluid to fill manometer |
| Measure cerebrospinal fluid (CSF) pressure correctly |
| Place tube under stopcock |
| Collect CSF |
| Screw on cap and place tube on tray |
| Withdraw the needle (unless procedure terminated early) |

Appendix 3. Global Rating Scale

| 1 - NoviceExtensive guidance would be needed*More than 2 major errors*🞎 | 2 - BeginnerMinimal guidance would be needed*1 or 2 major errors*🞎 | 3 - CompetentCan perform independently*Self-corrected errors, minor errors, or seemed hesitant*🞎 | 4 - ProficientCan perform independently*No errors*🞎 |
| --- | --- | --- | --- |
| **Major Error**: an error that will cause harm to a real patient Comments: | | | |
